# Supplementary material for: Hyper-diverse antigenic variation and resilience to transmission-reducing intervention in falciparum malaria
Source: Springer Nature journal article supplement (doi:10.1038/s41467-024-51468-6), 2024-08-26
Supplement: MOESM3 [file 41467_2024_51468_MOESM3_ESM.pdf › 41467_2024_51468_MOESM3_ESM.pdf]

## **Description of Additional Supplementary Files**

File Name: Supplementary Data 1

Description: Epidemiological and genetic parameters used in the stochastic simulations of the agent-based model.
